# Supplementary material for: The effects of gelatin–dopamine coating on polydimethylsiloxane substrates on pluripotency maintenance and myocardial differentiation of cultured mouse embryonic stem cells
Source: Royal Society of Chemistry journal article supplement (doi:10.1039/c6tb02631a), 2016-01-01
Supplement: c6tb02631a1.pdf [file c6tb02631a1.pdf]

**Fig.S1.** ESC adhesion on the gelatin-dopamine coated PDMS surfaces. (a-d) ESC adhesion on the gelatin or gelatin-dopamine coated PDMS surfaces.

**Fig.S2.** ESC viability on the gelatin-dopamine coated PDMS surfaces. (a-l) LIVE/DEAD staining of ESCs on the gelatin or gelatin-dopamine coated PDMS surfaces. Green color indicates live cells and red color indicates dead cells. Arrows indicate the detachment of ESCs from the gelatin coated PDMS surface.

**Fig.S3.** Immunostaining of pluripotent markers Nanog of the ESCs on the gelatin or gelatin-dopamine coated PDMS surfaces on day 7. (a-d): Nanog staining with red fluorescence; (e-h): DAPI staining with blue fluorescence; (i-l): merged.

**Fig.S4.** Immunostaining of pluripotent markers OCT4 of the ESCs on the gelatin or gelatin-dopamine coated PDMS surfaces on day 7. (a-d): OCT4 staining with red fluorescence; (e-h): DAPI staining with blue fluorescence; (i-l): merged.

**Fig.S5.** Immunostaining of cardiomyocytes marker cTnT of EBs on the gelatin-dopamine coated PDMS surfaces on day 14. (a-c): cTnT staining with green fluorescence; (d-f): DAPI staining with blue fluorescence; (g-i): merged.
