# Supplementary figures and images for: The effects of gelatin–dopamine coating on polydimethylsiloxane substrates on pluripotency maintenance and myocardial differentiation of cultured mouse embryonic stem cells
Source: Royal Society of Chemistry journal article supplement (doi:10.1039/c6tb02631a), 2016-01-01

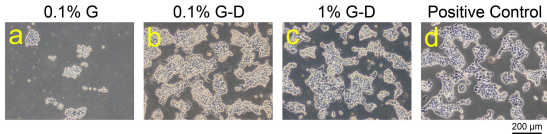

Supplement: c6tb02631a2.pdf [file c6tb02631a2.pdf]

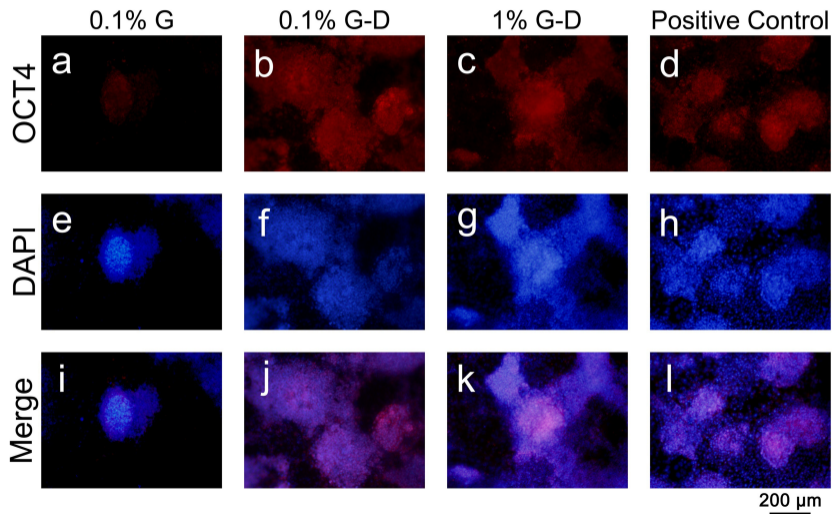

Supplement: c6tb02631a5.pdf [file c6tb02631a5.pdf]

0.1% G-D

1% G-D

Positive Control

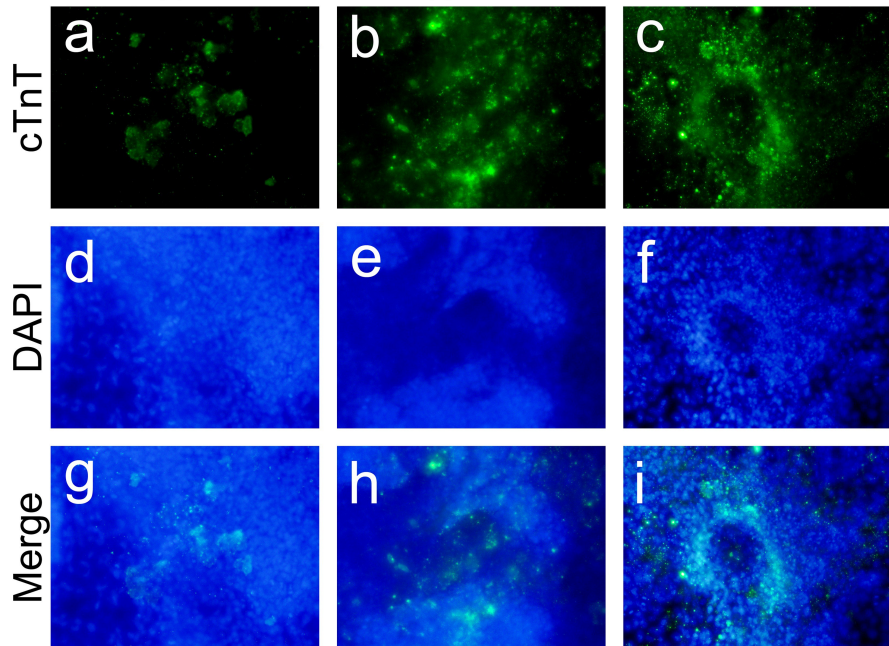

50  $\mu$ m

Supplement: c6tb02631a6.pdf [file c6tb02631a6.pdf]
